# Supplementary material
Source: ML conference proceedings conference paper supplement (https://proceedings.neurips.cc/paper_files/paper/2010/hash/e995f98d56967d946471af29d7bf99f1-Abstract.html)
Supplement: Supplementary file 2 [file e995f98d56967d946471af29d7bf99f1-Supplemental.zip]

Archive with 1 entries (1 files):
- extra/NIPS2010_0734_extra.pdf
